# Supplementary material for: “Domino” synthesis of bio-derived anethole over facile-prepared hafnium phosphonate frameworks with efficient bifunctional acid sites
Source: Royal Society of Chemistry journal article supplement (doi:10.1039/d3re00096f), 2023-01-01
Supplement: d3re00096f1.pdf [file d3re00096f1.pdf]

## Supplementary Material

1

2 **Domino synthesis of bio-derived anethole over facile prepared**  
3 **hafnium phosphonate frameworks with efficient bifunctional**  
4 **acid sites**

5 Long Chen<sup>¶a</sup>, Yixuan Liu<sup>¶a</sup>, Heng Zhang<sup>\*a</sup>, Yuncong Li<sup>a</sup>, Songdang Zhang<sup>a</sup>, Yulin Hu<sup>b</sup>,

6 Hu Li<sup>\*a</sup>, Song Yang<sup>\*a</sup>

7 *<sup>a</sup>State Key Laboratory Breeding Base of Green Pesticide & Agricultural*  
8 *Bioengineering, Key Laboratory of Green Pesticide & Agricultural Bioengineering,*  
9 *Ministry of Education, State-Local Joint Laboratory for Comprehensive Utilization of*  
10 *Biomass, Center for Research & Development of Fine Chemicals, Guizhou University,*  
11 *Guiyang, Guizhou 550025, China*

12 *<sup>b</sup>Faculty of Sustainable Design Engineering, University of Prince Edward Island,*  
13 *Charlottetown, PE C1A 4P3, Canada*

14

15 <sup>¶</sup>Equal contribution.

16 \* Correspondence should be addressed to Heng Zhang: [h Zhang23@gzu.edu.cn](mailto:h Zhang23@gzu.edu.cn), Hu Li:

17 [hli13@gzu.edu.cn](mailto:hli13@gzu.edu.cn), and Song Yang: [jhzx.msm@gmail.com](mailto:jhzx.msm@gmail.com).

18

19 Submission for *Reaction Chemistry & Engineering*

20

*December 27, 2022*

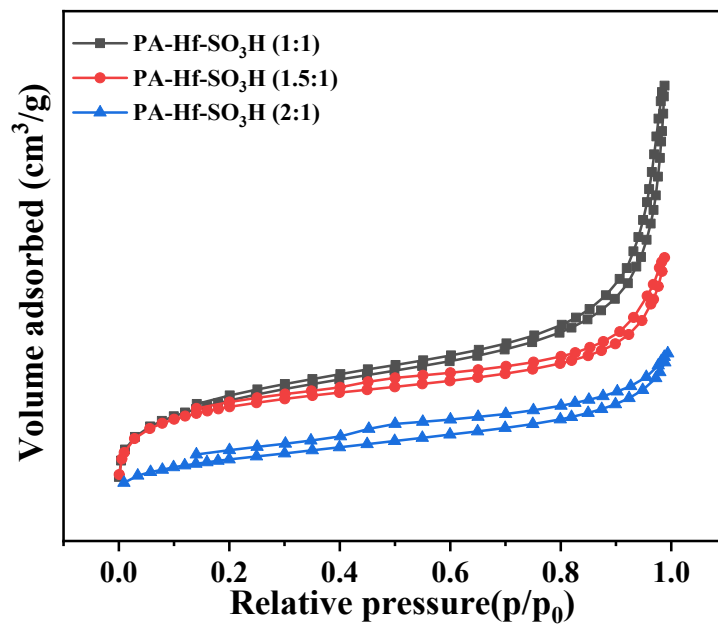

21

22

**Fig S1.** N<sub>2</sub> adsorption-desorption isotherms of the catalysts with different components.

23

24

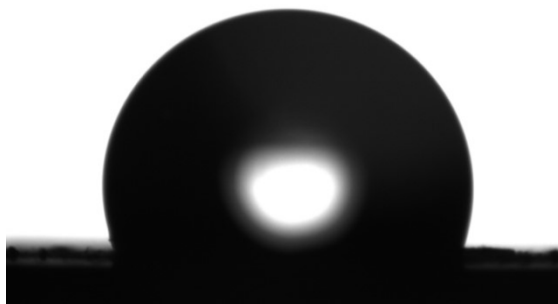

25

26

PA-Hf-SO<sub>3</sub>H (2:1) (CA≈110°)

27

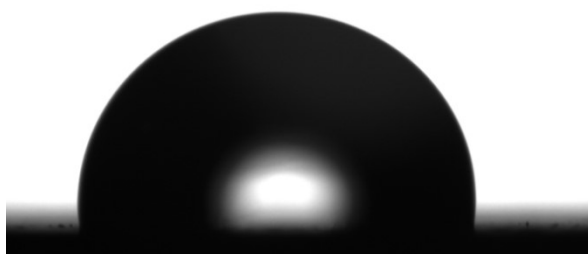

28

PA-Hf-SO<sub>3</sub>H (1.5:1) (CA≈91°)

29

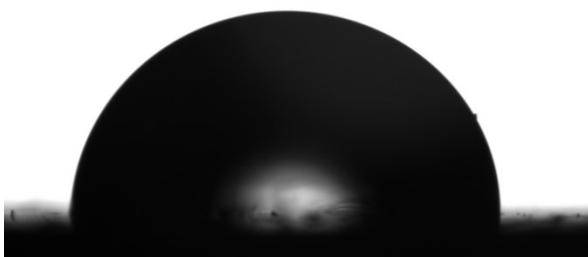

30

PA-Hf-SO<sub>3</sub>H (1:1) (CA≈80°)

31

**Fig S2.** Contact angles of water droplets on the surface of different catalysts.

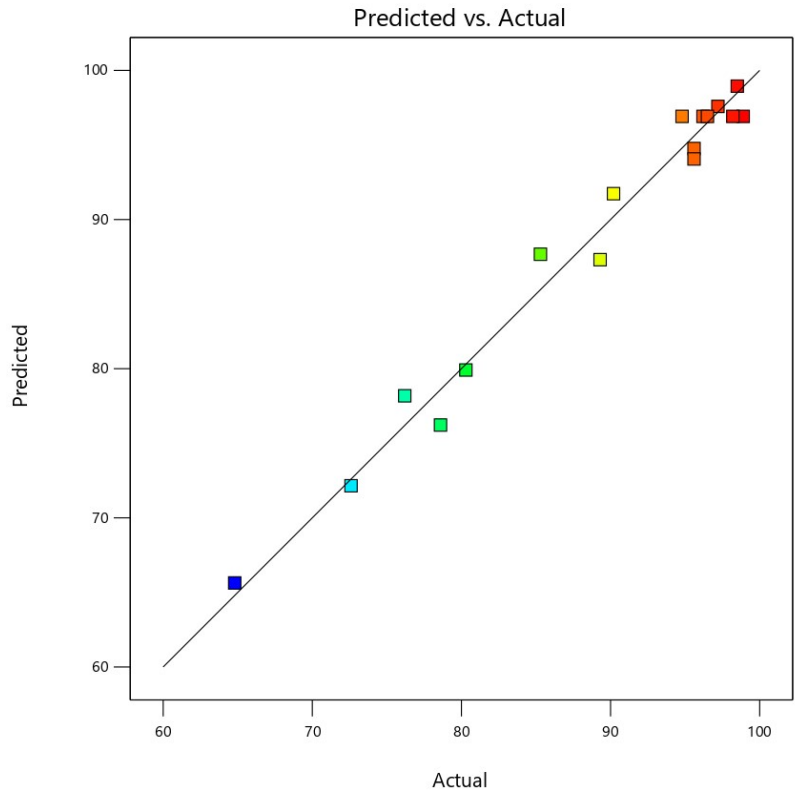

32

33

**Fig S3.** The relative parity of the AN yield and predicted value.

34

35 Table S1. The design matrix includes experimental variables (A-C) and AN yield (Response Value).

| <b>Run</b> | <b>Temperature (°C)</b> | <b>Time (h)</b> | <b>Catalyst dosage (g)</b> | <b>Yield/%</b> |
|------------|-------------------------|-----------------|----------------------------|----------------|
| <b>No.</b> | <b>(A)</b>              | <b>(B)</b>      | <b>(C)</b>                 |                |
| 1          | 250                     | 2               | 0.06                       | 96.8           |
| 2          | 220                     | 1.5             | 0.06                       | 97.5           |
| 3          | 190                     | 1.5             | 0.08                       | 76.2           |
| 4          | 220                     | 2               | 0.04                       | 90.2           |
| 5          | 250                     | 1               | 0.06                       | 85.3           |
| 6          | 190                     | 1               | 0.06                       | 72.6           |
| 7          | 220                     | 1.5             | 0.06                       | 98.3           |
| 8          | 220                     | 1.5             | 0.06                       | 97.5           |
| 9          | 220                     | 1               | 0.04                       | 80.3           |
| 10         | 250                     | 1.5             | 0.08                       | 96.4           |
| 11         | 220                     | 1.5             | 0.06                       | 96.2           |
| 12         | 220                     | 1               | 0.08                       | 95.6           |
| 13         | 190                     | 2               | 0.06                       | 96.2           |
| 14         | 190                     | 1.5             | 0.04                       | 64.8           |
| 15         | 250                     | 1.5             | 0.04                       | 89.3           |
| 16         | 220                     | 1.2             | 0.06                       | 94.8           |
| 17         | 220                     | 2               | 0.08                       | 97.2           |
